# Supplementary material for: An efficient single-cell transcriptomics workflow for microbial eukaryotes benchmarked on Giardia intestinalis cells
Source: PubMed Central journal article supplement (PMC7325058; doi:10.1186/s12864-020-06858-7), 2020-06-29

### Smart-seq2

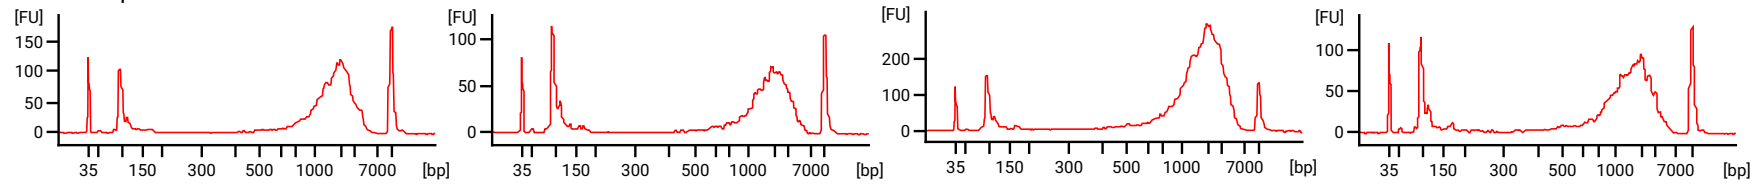

### Freeze thaw

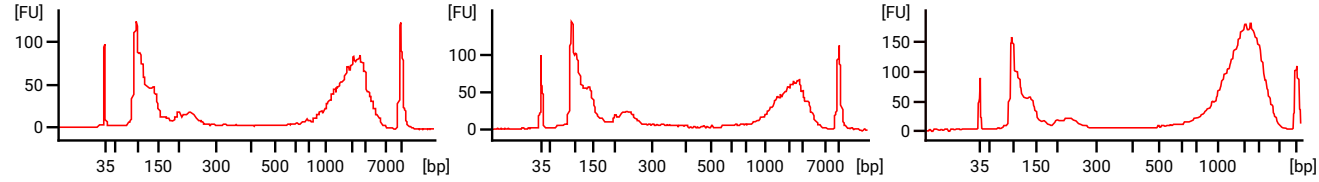

### All changes

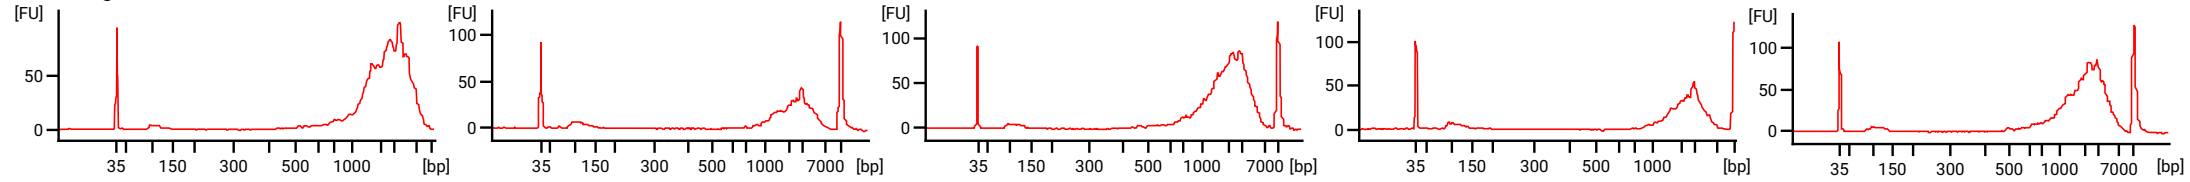

### In-house beads

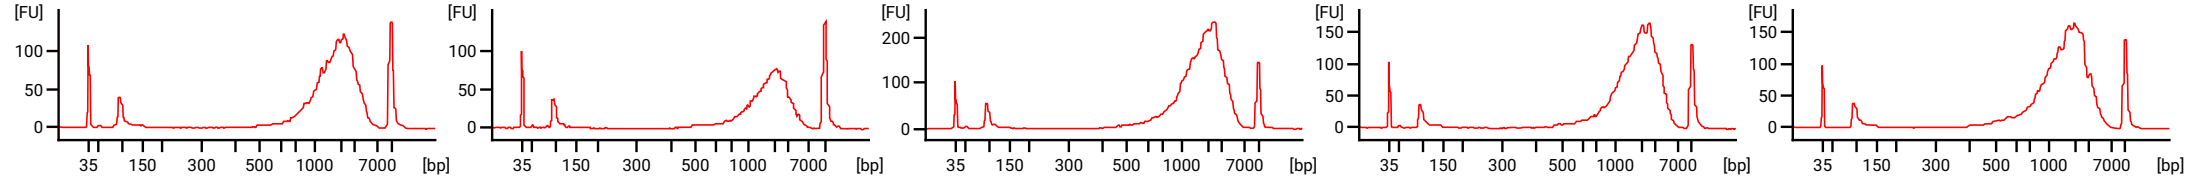

### Half volumes

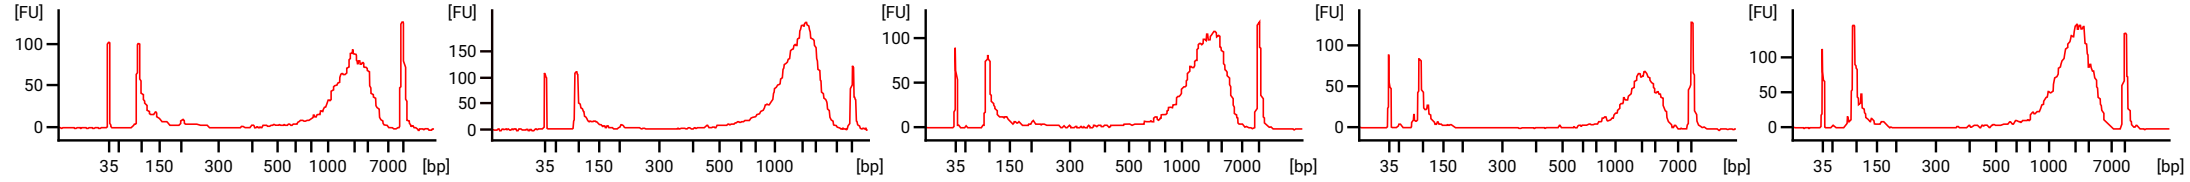

### 5' Biotin mod.

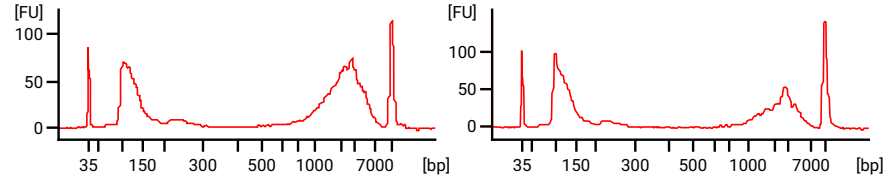

### 1 μM oligo-dT

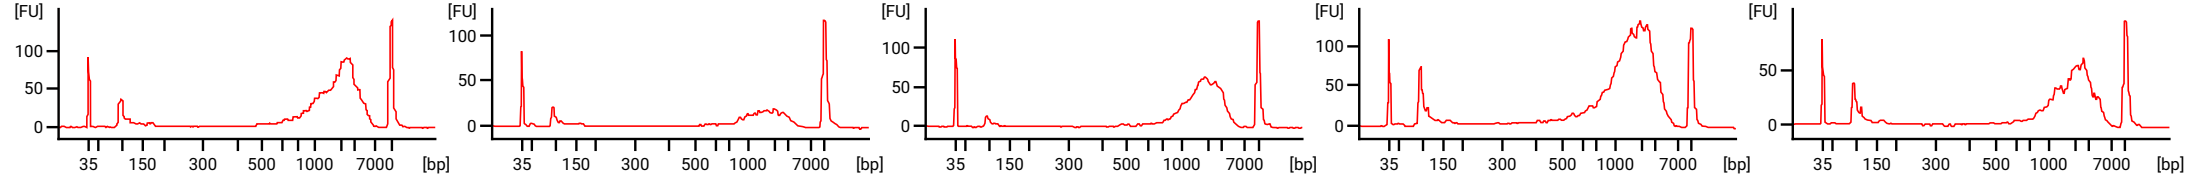

Supplement: 12864_2020_6858_MOESM1_ESM.pdf [file 12864_2020_6858_MOESM1_ESM.pdf]
