# Supplementary material for: An efficient single-cell transcriptomics workflow for microbial eukaryotes benchmarked on Giardia intestinalis cells
Source: PubMed Central journal article supplement (PMC7325058; doi:10.1186/s12864-020-06858-7), 2020-06-29
Supplement: 12864_2020_6858_MOESM2_ESM.pdf [file 12864_2020_6858_MOESM2_ESM.pdf]

NW\_00247110.1

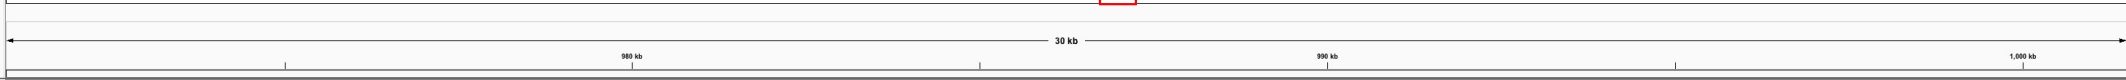

BRR9222552\_AC\_sorted.bam Cc  
BRR9222552\_AC\_sorted.bam Au  
ns

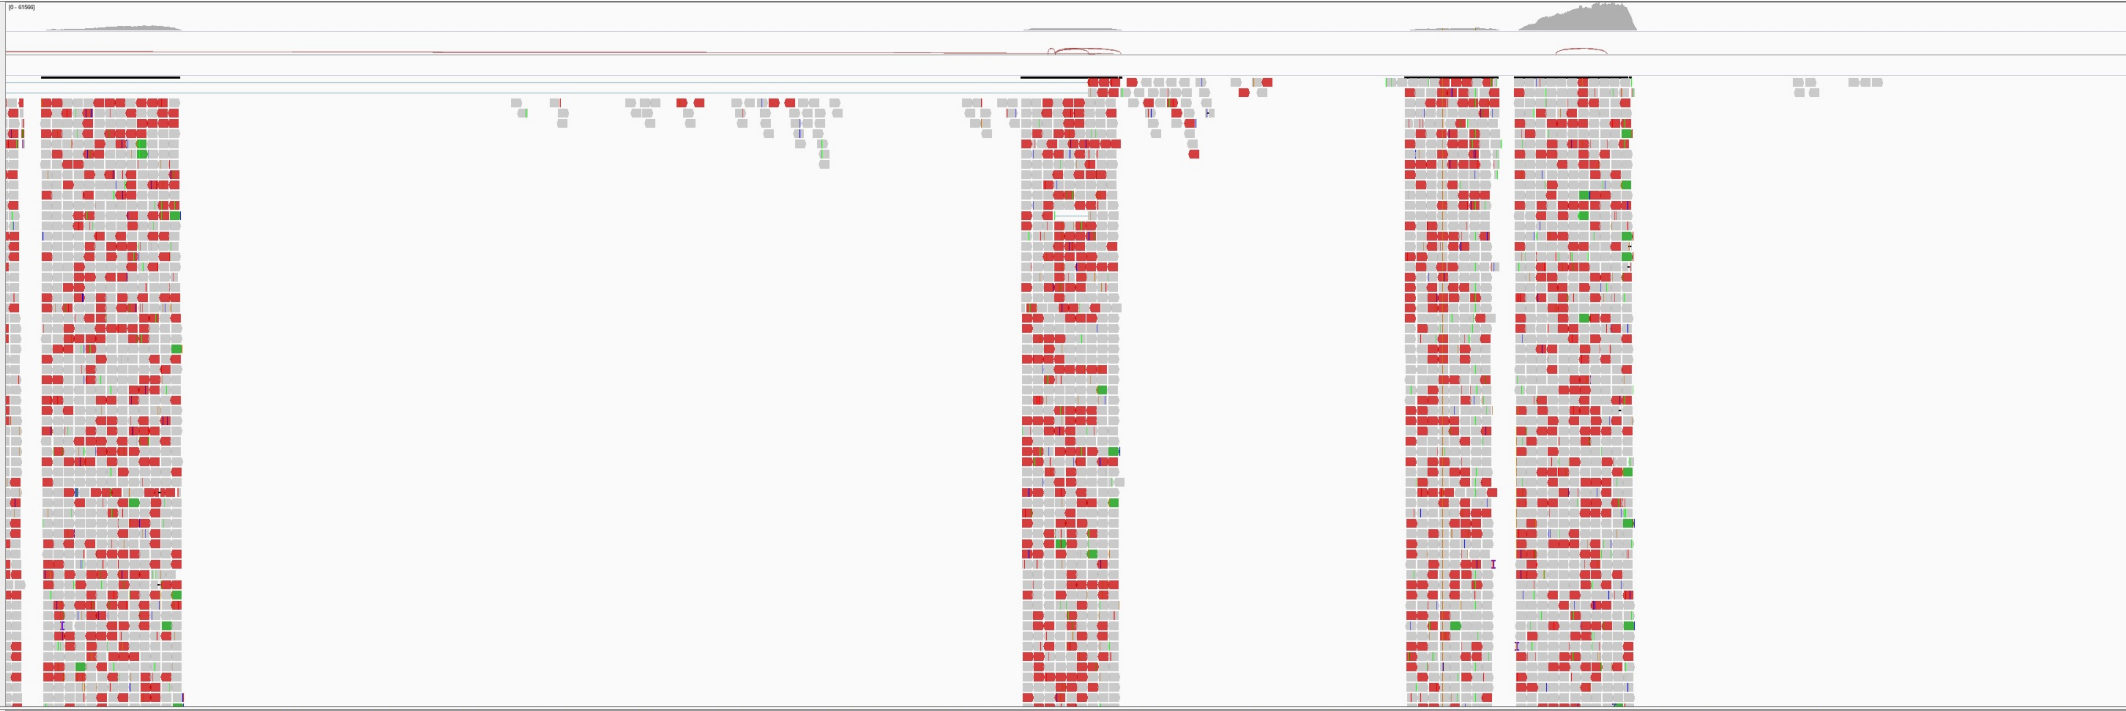

Gene

44193 XM\_001705697.1 XM\_001705700.1 XM\_001705701.1 XM\_001705703.1 XM\_001705704.1
